# Supplementary material for: Pine pollen reverses the function of hepatocellular carcinoma by inhibiting α-Enolase mediated PI3K/AKT signaling pathway
Source: PubMed Central journal article supplement (PMC11584142; doi:10.1371/journal.pone.0312434), 2024-11-22

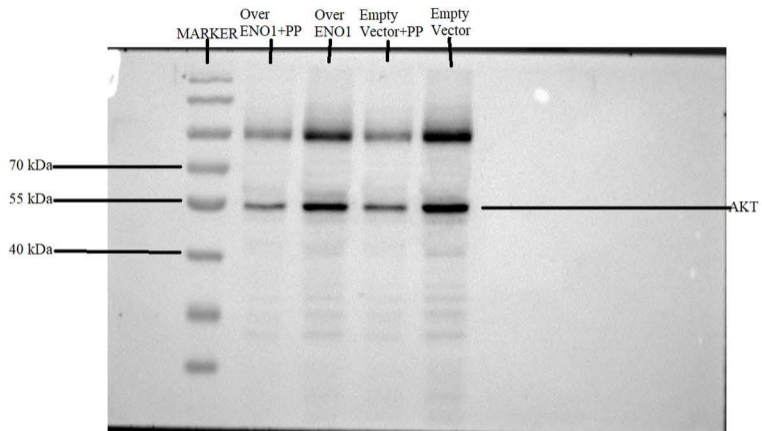

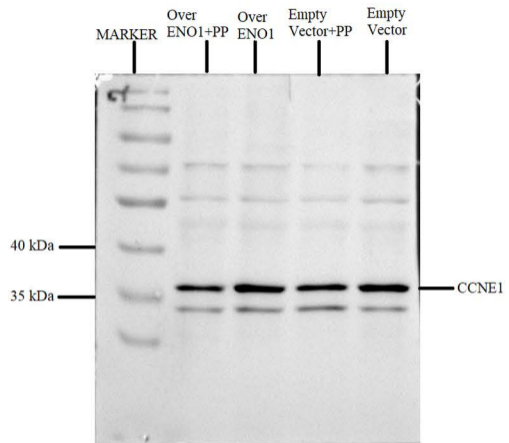

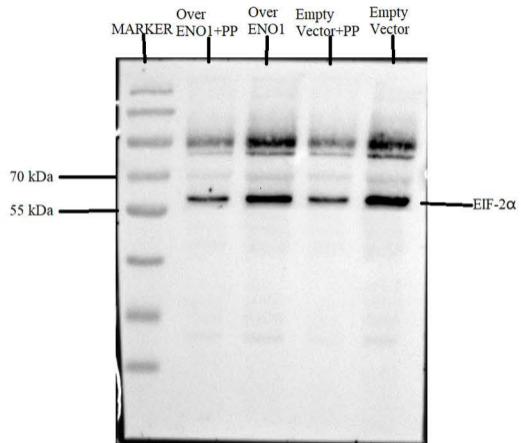

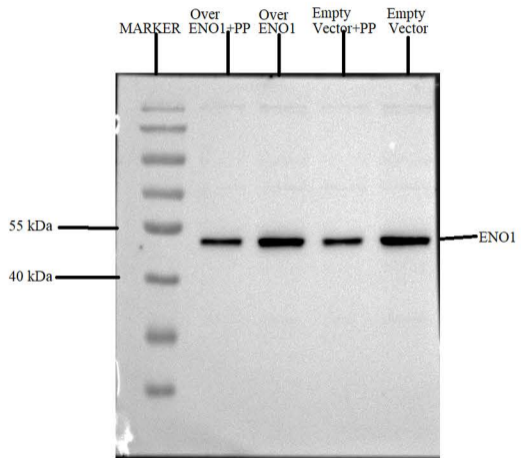

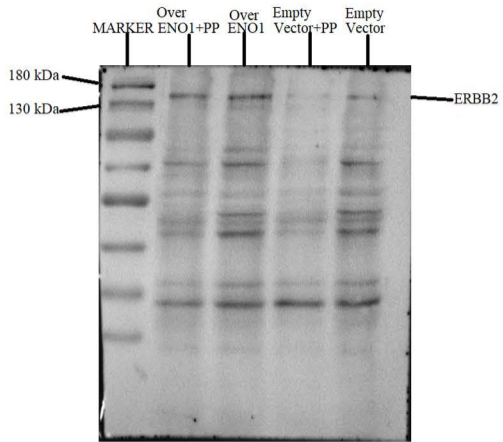

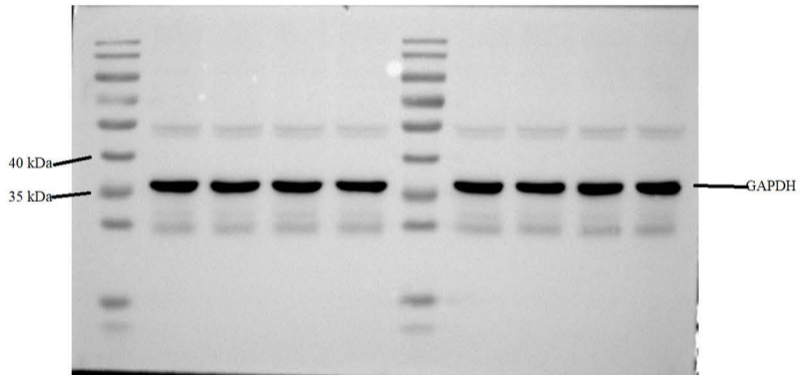

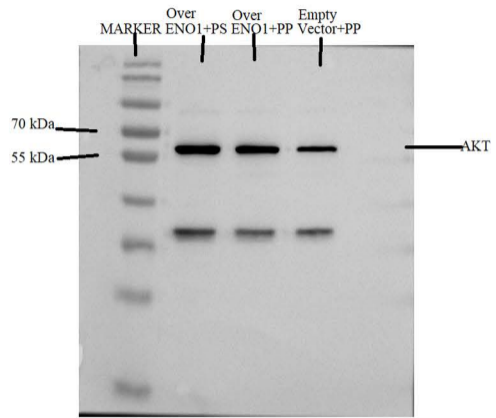

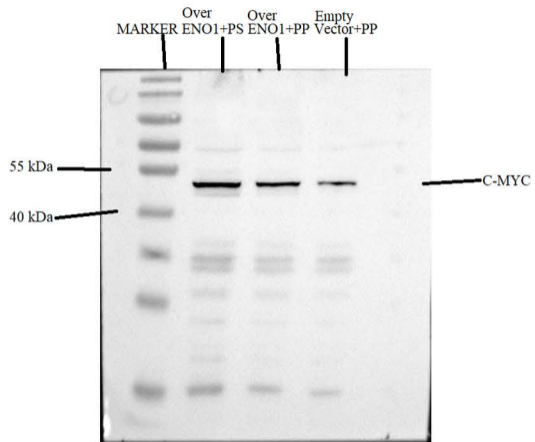



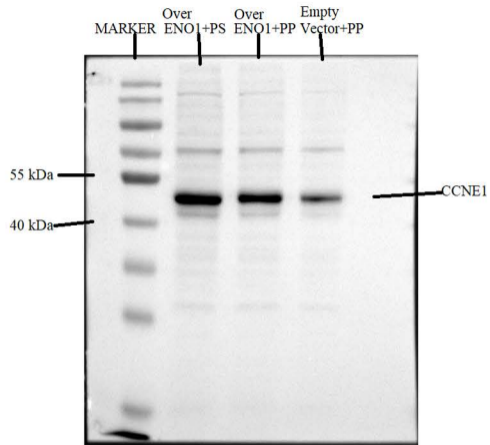

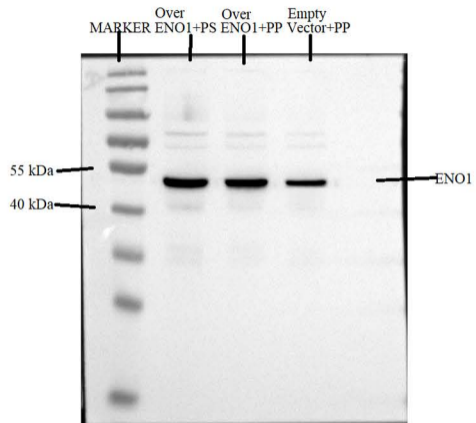

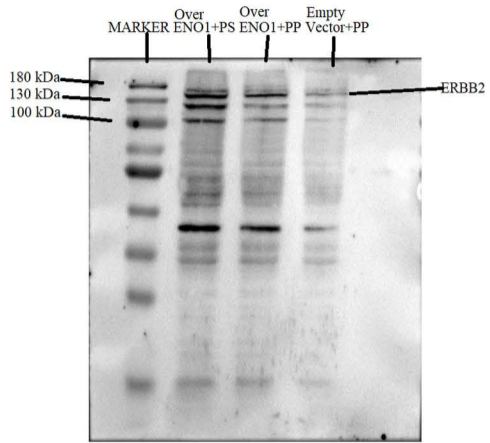

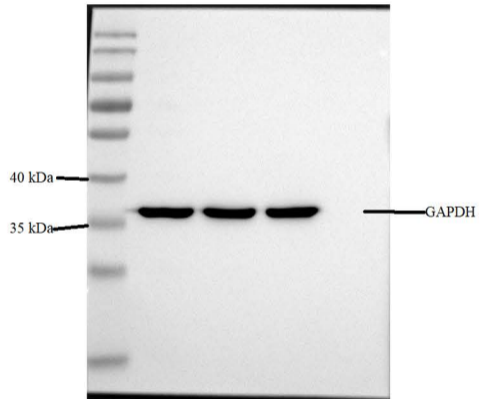

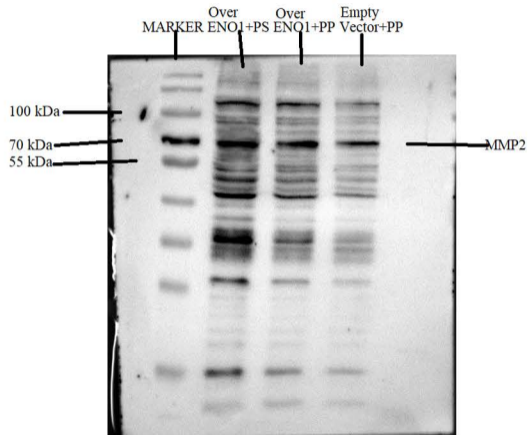

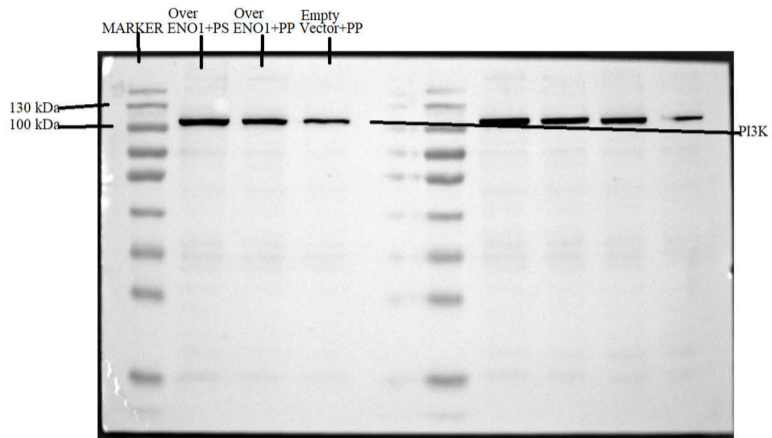

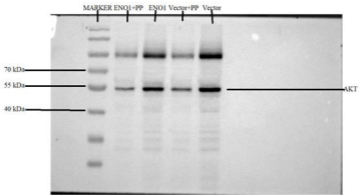

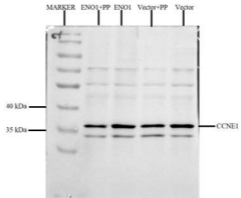



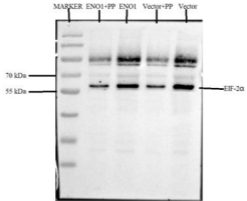

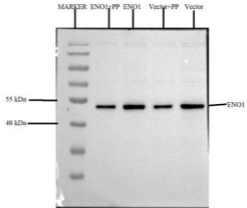

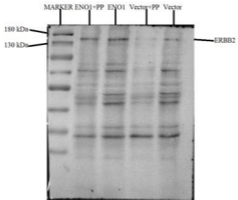

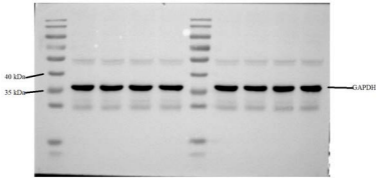

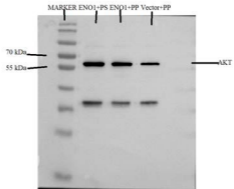

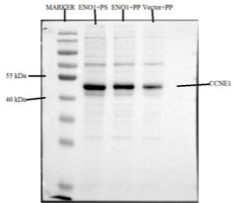

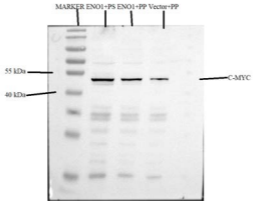

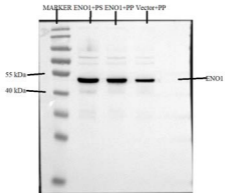



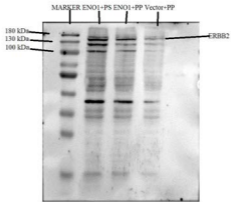

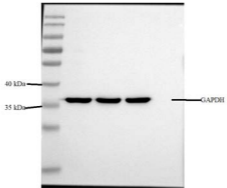

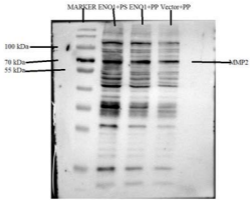

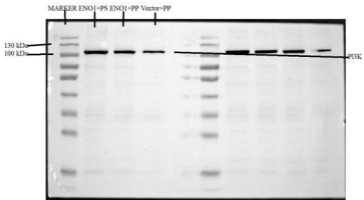

Supplement: pone.0312434.s001.pdf [file pone.0312434.s001.pdf]
